# Supplementary material
Source: HighWire-hosted journal article supplement (https://www.qdcxjkg.com/highwire/filestream/114415/field_highwire_adjunct_files/0/ERJ-01477-2012_Disclosures.pdf)
Supplement: ERJ-01477-2012_Disclosures.pdf [file ERJ-01477-2012_Disclosures.pdf]

**S. Baron** has received reimbursement for attending a symposium, a fee for organising education, funds for research and for a member of staff, consulting fees and gifts from GSK, Heinen + Loewenstein, Lilly, Linde, Novartis, Nycomed and ResMed.

**M. Held** has received consulting fees and honoraria for lectures from Actelion, Bayer Healthcare, GlaxoSmithKline, Heinen + Loewenstein, Lilly, Novartis, Pfizer, Roche and Servier and travel support from Actelion, GlaxoSmithKline, Lilly and Novartis.

**C. Roth** has received honoraria for speaking activities for Heinen + Loewenstein and travel support from ResMed.
